# Supplementary material for: Factors associated with postpartum depression among women in Vientiane Capital, Lao People’s Democratic Republic: A cross-sectional study
Source: PubMed Central journal article supplement (PMC7717544; doi:10.1371/journal.pone.0243463), 2020-12-04
Supplement: pone.0243463.s001.pdf [file pone.0243463.s001.pdf]

ກະລຸນາໝາຍອ້ອມວົງມົນໃສ່ໃນຂໍ້ທີ່ຄົນເຈັບຕອບວ່າຖືກກັບໂຕເອງທີ່ສຸດ ກ່ຽວກັບຄວາມຮູ້ສຶກຂອງເຂົາເຈົ້າໃນຊ່ວງ 7 ມື້ ກ່ອນທີ່ຈະມາກວດຫຼັງເກີດນີ້

|                                                                                                                                                                                                                                                                                                                                                                                                                                                                                                                                                                                                                                                                                                                                                                                                                                                                                                                                                                                                                                                                                                                                                                                                                                                                                                                                                                                                                                                                                                                                                      |                                                                                                                                                                                                                                                                                                                                                                                                                                                                                                                                                                                                                                                                                                                                                                                                                                                                                                                                                                                                                                                                                                                                                                                                                                                                                                                                                                                                                                                                                                                                                                  |
|------------------------------------------------------------------------------------------------------------------------------------------------------------------------------------------------------------------------------------------------------------------------------------------------------------------------------------------------------------------------------------------------------------------------------------------------------------------------------------------------------------------------------------------------------------------------------------------------------------------------------------------------------------------------------------------------------------------------------------------------------------------------------------------------------------------------------------------------------------------------------------------------------------------------------------------------------------------------------------------------------------------------------------------------------------------------------------------------------------------------------------------------------------------------------------------------------------------------------------------------------------------------------------------------------------------------------------------------------------------------------------------------------------------------------------------------------------------------------------------------------------------------------------------------------|------------------------------------------------------------------------------------------------------------------------------------------------------------------------------------------------------------------------------------------------------------------------------------------------------------------------------------------------------------------------------------------------------------------------------------------------------------------------------------------------------------------------------------------------------------------------------------------------------------------------------------------------------------------------------------------------------------------------------------------------------------------------------------------------------------------------------------------------------------------------------------------------------------------------------------------------------------------------------------------------------------------------------------------------------------------------------------------------------------------------------------------------------------------------------------------------------------------------------------------------------------------------------------------------------------------------------------------------------------------------------------------------------------------------------------------------------------------------------------------------------------------------------------------------------------------|
| <p><b>1. ຂ້ອຍສາມາດຍື່ມຫິວໄດ້ ແລະ ເຫັນສິ່ງຕ່າງໆເປັນເລື່ອງຕະຫຼົກດີ</b></p> <p><input type="checkbox"/> ຫຼາຍເທົ່າໆກັບທີ່ຂ້ອຍເຄີຍເປັນມາ</p> <p><input type="checkbox"/> ຂ້ອນຂ້າງໜ້ອຍກວ່າທີ່ເຄີຍເປັນມາ</p> <p><input type="checkbox"/> ດຽວນີ້ໜ້ອຍລົງຫຼາຍຢ່າງເຫັນໄດ້ແຈ້ງ</p> <p><input type="checkbox"/> ບໍ່ມີເລີຍ</p> <p><b>2. ຂ້ອຍຕັ້ງຕາລໍຄອຍສິ່ງຕ່າງໆດ້ວຍຄວາມສຸກ(ຍິນດີ)</b></p> <p><input type="checkbox"/> ຫຼາຍເທົ່າໆກັບທີ່ຂ້ອຍເຄີຍເປັນມາ</p> <p><input type="checkbox"/> ຂ້ອນຂ້າງໜ້ອຍກວ່າທີ່ເຄີຍເປັນມາ</p> <p><input type="checkbox"/> ດຽວນີ້ໜ້ອຍລົງຫຼາຍຢ່າງເຫັນໄດ້ແຈ້ງ</p> <p><input type="checkbox"/> ບໍ່ມີຄວາມຍິນດີຫຍັງເລີຍ</p> <p><b>3. ເມື່ອມີສິ່ງຜິດພາດເກີດຂຶ້ນ ຂ້ອຍມັກໂທດຕົວເອງໂດຍທີ່ບໍ່ຈໍາເປັນ</b></p> <p><input type="checkbox"/> ບໍ່ເຄີຍເປັນຈັກເທື່ອ</p> <p><input type="checkbox"/> ບໍ່ຄ່ອຍເປັນປານໃດ</p> <p><input type="checkbox"/> ແມ່ນແລ້ວ ເປັນບາງຄັ້ງ</p> <p><input type="checkbox"/> ແມ່ນແລ້ວ, ສ່ວນໃຫຍ່ມັກໂທດຕົວເອງເກືອບຕະຫຼອດເວລາ</p> <p><b>4. ຂ້ອຍມີຄວາມຮູ້ສຶກອຸກໃຈ ຫຼື ວິຕົກກັງວົນ ໂດຍບໍ່ມີເຫດຜົນ</b></p> <p><input type="checkbox"/> ບໍ່, ບໍ່ເຄີຍເປັນເລີຍ</p> <p><input type="checkbox"/> ບໍ່ຄ່ອຍເປັນ, ດືນຶງເທື່ອໜຶ່ງ</p> <p><input type="checkbox"/> ແມ່ນແລ້ວ ມັກເປັນບາງຄັ້ງ</p> <p><input type="checkbox"/> ແມ່ນແລ້ວ, ມັກເປັນເລື້ອຍໆ</p> <p><b>5. ຂ້ອຍມັກຍ້ານກົວ ຫຼື ຕົກໃຈກະວົນກະວາຍ ໂດຍບໍ່ມີເຫດຜົນ</b></p> <p><input type="checkbox"/> ບໍ່, ບໍ່ເຄີຍເປັນເລີຍ</p> <p><input type="checkbox"/> ບໍ່ຄ່ອຍເປັນປານໃດ</p> <p><input type="checkbox"/> ແມ່ນແລ້ວ, ເປັນບາງຄັ້ງ</p> <p><input type="checkbox"/> ແມ່ນແລ້ວ, ມັກເປັນຕະຫຼອດ</p> | <p><b>6. ມີບັນຫາສາລະພັດຢ່າງກໍາລັງເກີດຂຶ້ນກັບຂ້ອຍຕອນນີ້</b></p> <p><input type="checkbox"/> ບໍ່ມີບັນຫາຫຍັງ, ຂ້ອຍສາມາດຮັບມືກັບບັນຫາໄດ້ດີຄືເກົ່າ</p> <p><input type="checkbox"/> ບໍ່ມີບັນຫາ, ສ່ວນໃຫຍ່ແລ້ວແມ່ນຂ້ອຍຈັດການກັບບັນຫາໄດ້ດີ</p> <p><input type="checkbox"/> ມີບັນຫາ, ບາງຄັ້ງກໍ່ຮັບມື ແລະ ຈັດການບໍ່ໄດ້ດີຄືແຕ່ເກົ່າ</p> <p><input type="checkbox"/> ມີບັນຫາ, ສ່ວນຫຼາຍແລ້ວແມ່ນຮັບບໍ່ໄຫວ, ຂ້ອຍບໍ່ສາມາດຈັດການກັບມັນໄດ້ເລີຍ</p> <p><b>7. ຂ້ອຍບໍ່ມີຄວາມສຸກເລີຍ ຈົນເຮັດໃຫ້ຂ້ອຍນອນບໍ່ຫຼັບ</b></p> <p><input type="checkbox"/> ບໍ່ເຄີຍເປັນເລີຍ</p> <p><input type="checkbox"/> ບໍ່ຄ່ອຍເປັນປານໃດ</p> <p><input type="checkbox"/> ແມ່ນແລ້ວ, ເປັນບາງຄັ້ງ</p> <p><input type="checkbox"/> ແມ່ນແລ້ວ, ເປັນເກືອບຕະຫຼອດເວລາ</p> <p><b>8. ຂ້ອຍຮູ້ສຶກໂສກເສົ້າ ແລະ ຫົດຫູ່</b></p> <p><input type="checkbox"/> ບໍ່ເຄີຍເປັນເລີຍ</p> <p><input type="checkbox"/> ບໍ່ຄ່ອຍເປັນປານໃດ</p> <p><input type="checkbox"/> ແມ່ນແລ້ວ, ເປັນບາງຄັ້ງ</p> <p><input type="checkbox"/> ແມ່ນແລ້ວ, ເປັນເກືອບຕະຫຼອດເວລາ</p> <p><b>9. ຂ້ອຍຮູ້ສຶກບໍ່ມີຄວາມສຸກຫຼາຍຈົນຮ້ອງໄຫ້</b></p> <p><input type="checkbox"/> ບໍ່ເຄີຍເປັນເລີຍ</p> <p><input type="checkbox"/> ບໍ່ຄ່ອຍເປັນປານໃດ</p> <p><input type="checkbox"/> ແມ່ນແລ້ວ, ເປັນບາງຄັ້ງ</p> <p><input type="checkbox"/> ແມ່ນແລ້ວ, ເປັນເກືອບຕະຫຼອດເວລາ</p> <p><b>10. ຂ້ອຍເກີດມີຄວາມຄິດຢາກທໍາຮ້າຍຕົນເອງ</b></p> <p><input type="checkbox"/> ບໍ່ເຄີຍຄິດເລີຍ</p> <p><input type="checkbox"/> ບໍ່ຄ່ອຍມີຄວາມຄິດນີ້ໃນຫົວເລີຍ</p> <p><input type="checkbox"/> ແມ່ນ, ມີຄວາມຄິດເປັນບາງຄັ້ງ</p> <p><input type="checkbox"/> ແມ່ນແລ້ວ, ມີຄວາມຄິດເກືອບຕະຫຼອດເວລາ</p> |
|------------------------------------------------------------------------------------------------------------------------------------------------------------------------------------------------------------------------------------------------------------------------------------------------------------------------------------------------------------------------------------------------------------------------------------------------------------------------------------------------------------------------------------------------------------------------------------------------------------------------------------------------------------------------------------------------------------------------------------------------------------------------------------------------------------------------------------------------------------------------------------------------------------------------------------------------------------------------------------------------------------------------------------------------------------------------------------------------------------------------------------------------------------------------------------------------------------------------------------------------------------------------------------------------------------------------------------------------------------------------------------------------------------------------------------------------------------------------------------------------------------------------------------------------------|------------------------------------------------------------------------------------------------------------------------------------------------------------------------------------------------------------------------------------------------------------------------------------------------------------------------------------------------------------------------------------------------------------------------------------------------------------------------------------------------------------------------------------------------------------------------------------------------------------------------------------------------------------------------------------------------------------------------------------------------------------------------------------------------------------------------------------------------------------------------------------------------------------------------------------------------------------------------------------------------------------------------------------------------------------------------------------------------------------------------------------------------------------------------------------------------------------------------------------------------------------------------------------------------------------------------------------------------------------------------------------------------------------------------------------------------------------------------------------------------------------------------------------------------------------------|

ການໝາຍຄະແນນ: ແມ່ນຈະໃຫ້ຄະແນນຕົວເລືອກຄໍາຕອບຂອງແຕ່ລະຄໍາຖາມເປັນ 0, 1, 2 ແລະ 3 ຕາມລຳດັບ. ໂດຍຄະແນນ EPDS ແມ່ນການເອົາຄະແນນທີ່ໄດ້ຈາກຄໍາຕອບຂອງແມ່ຍິງໝາຍໃນແຕ່ລະຂໍ້ນັ້ນມາບວກໃສ່ກັນ ເປັນຄະແນນລວມທັງໝົດ.
